# Supplementary material
Source: bioRxiv or medRxiv preprint supplement (https://www.biorxiv.org/highwire/filestream/23330/field_highwire_adjunct_files/10/083931-4.pdf)

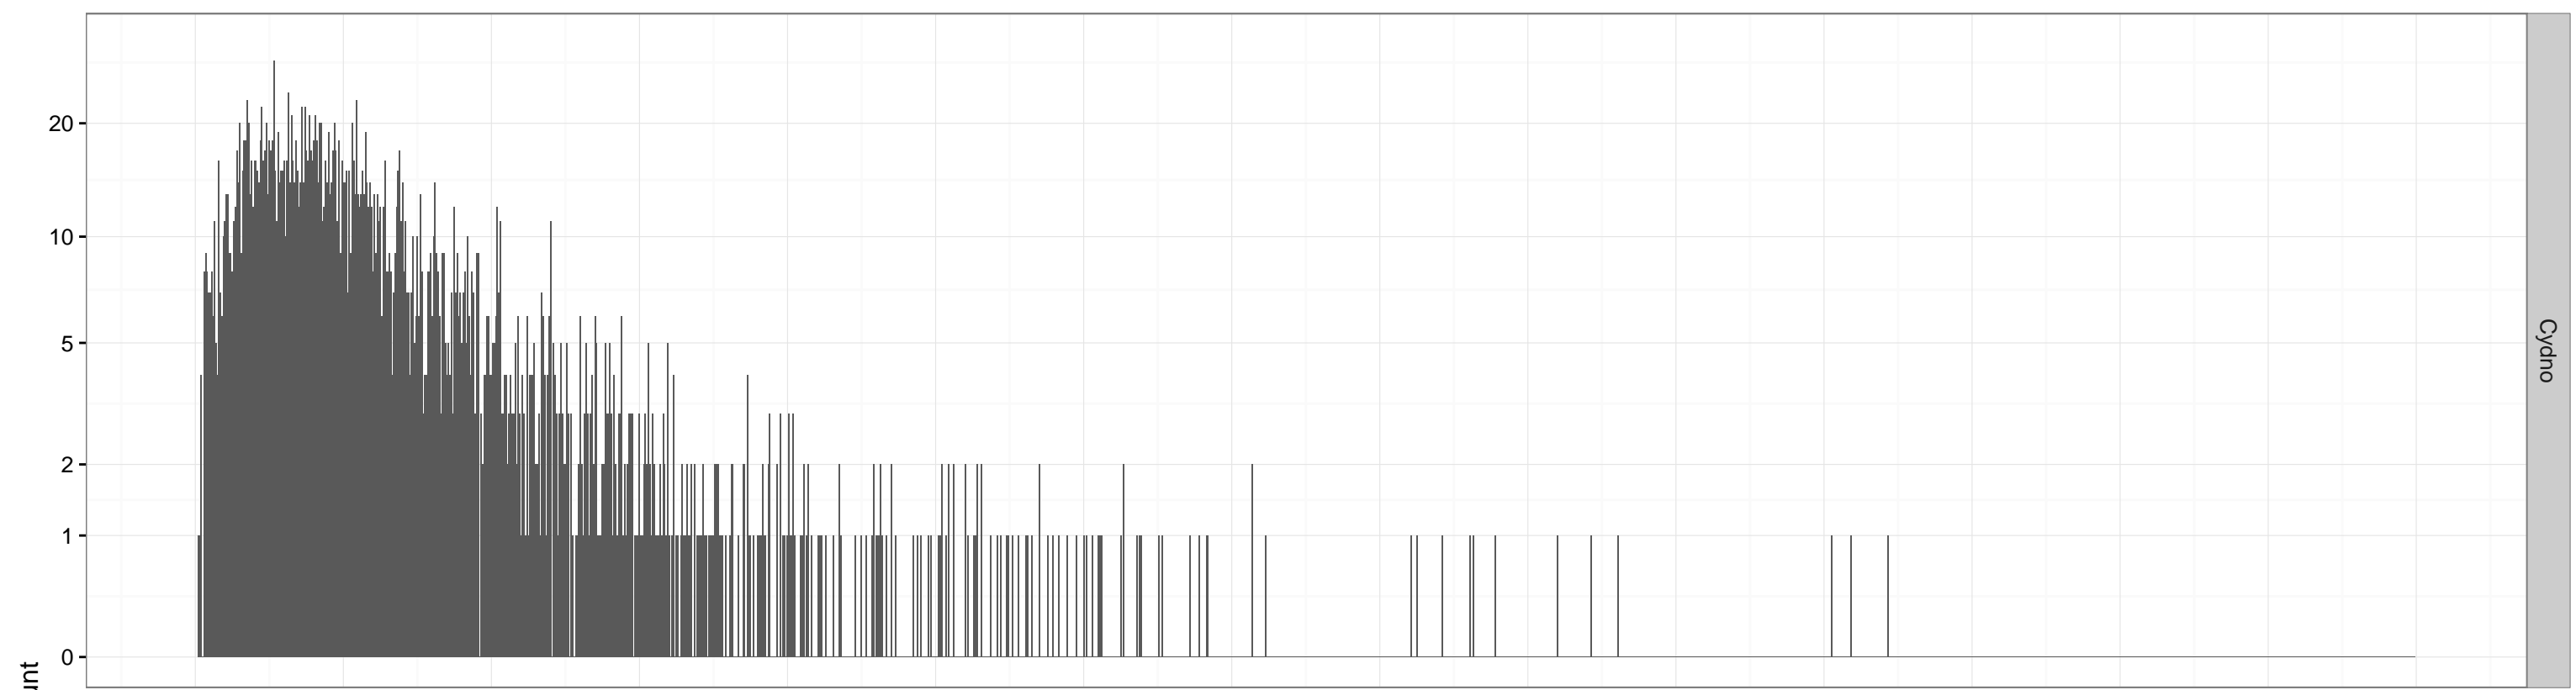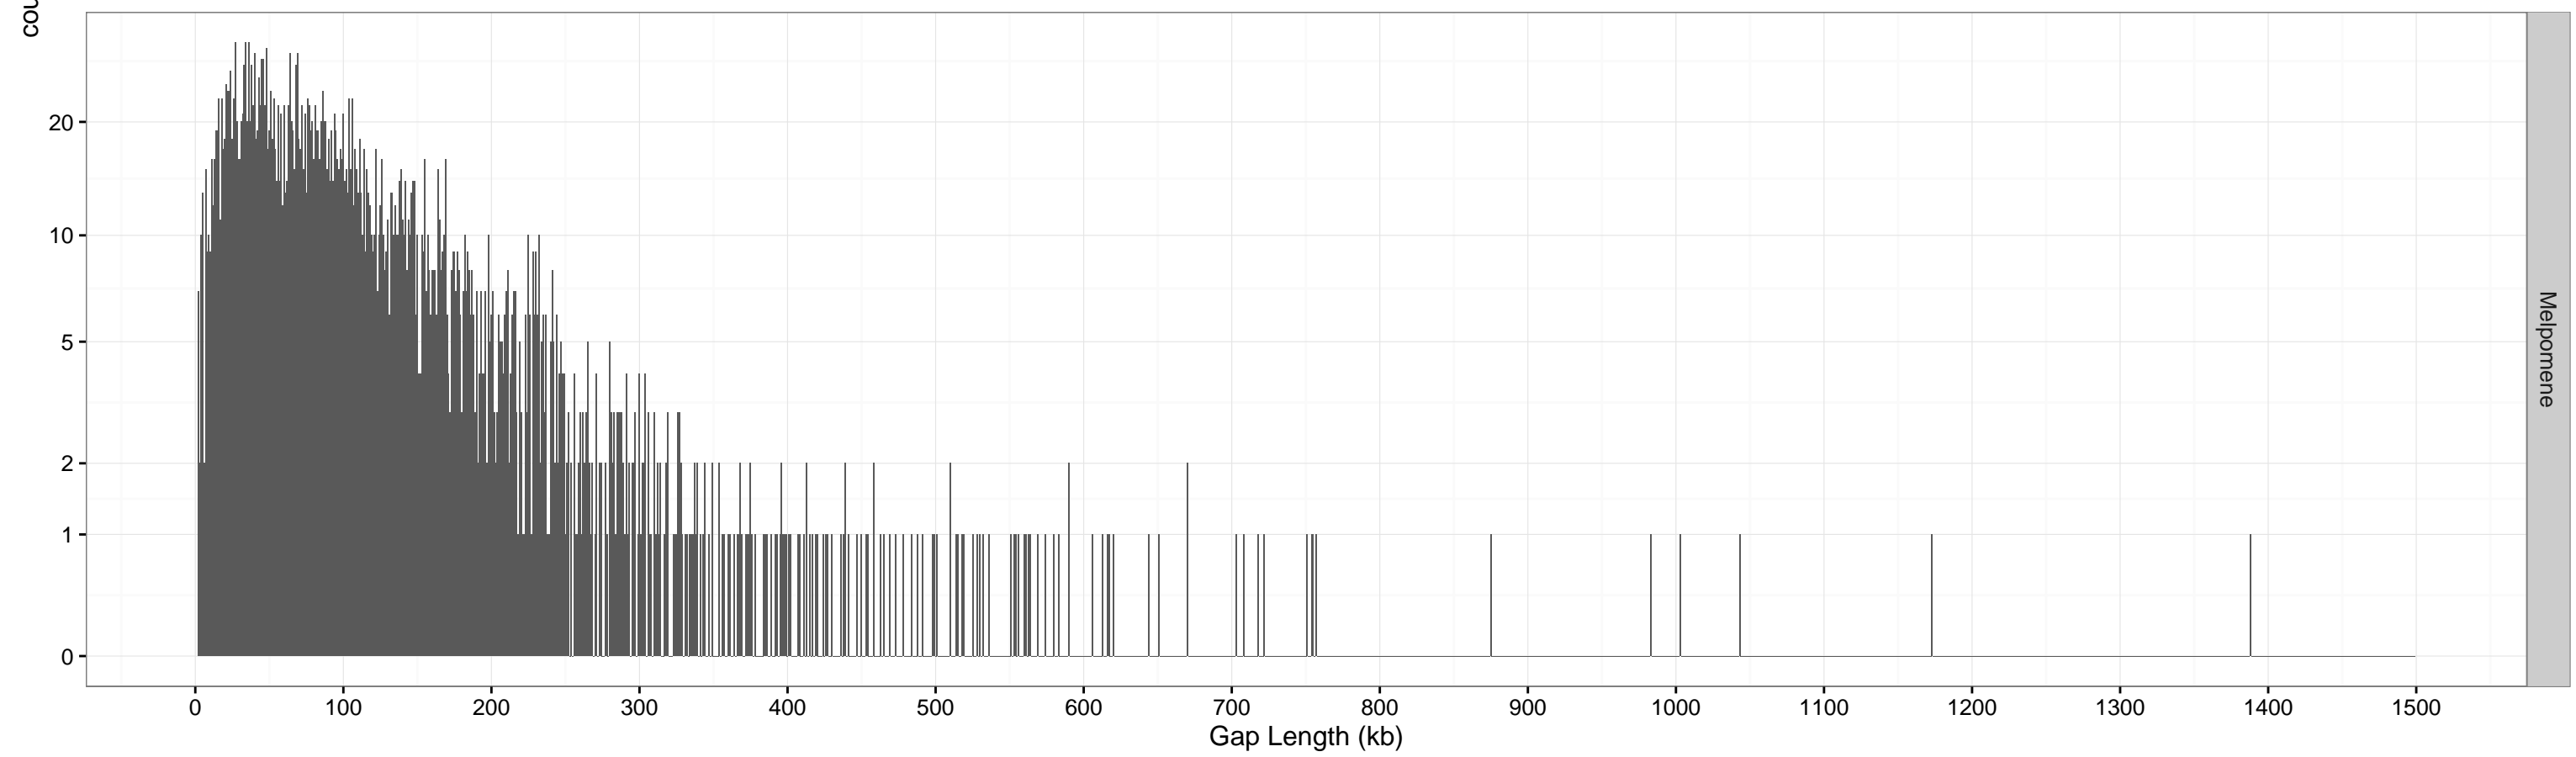

Supplement: Supplementary file [file 083931-4.pdf]
